# Supplementary material
Source: publisher figshare collection journal article supplement (https://acs.figshare.com/ndownloader/files/28064035)
Supplement: Supplementary file [file 28064035]

# Autofluorescence of Amyloids Determined by Enantiomeric Composition of Peptides

*Manuela Grelich-Mucha<sup>a</sup>, Ana M. Garcia<sup>b</sup>, Vladimir Torbeev<sup>b</sup>, Katarzyna Ożga<sup>c</sup>, Łukasz Berlicki<sup>c</sup>, Joanna Olesiak-Bańska<sup>a\*</sup>*

<sup>a</sup> Advanced Materials Engineering and Modelling Group, Wrocław University of Science and Technology, Wybrzeże Wyspiańskiego 27, 50-370 Wrocław, Poland.

<sup>b</sup> Institut de Science et d'Ingénierie Supramoléculaires (ISIS), International Center for Frontier Research in Chemistry (icFRC), University of Strasbourg, CNRS (UMR 7006), Strasbourg 67000, France.

<sup>c</sup> Department of Bioorganic Chemistry, Faculty of Chemistry, Wrocław University of Science and Technology, Wybrzeże Wyspiańskiego 27, 50-370 Wrocław, Poland.

Corresponding author's e-mail: joanna.olesiak@pwr.edu.pl

## EXPERIMENTAL SECTION

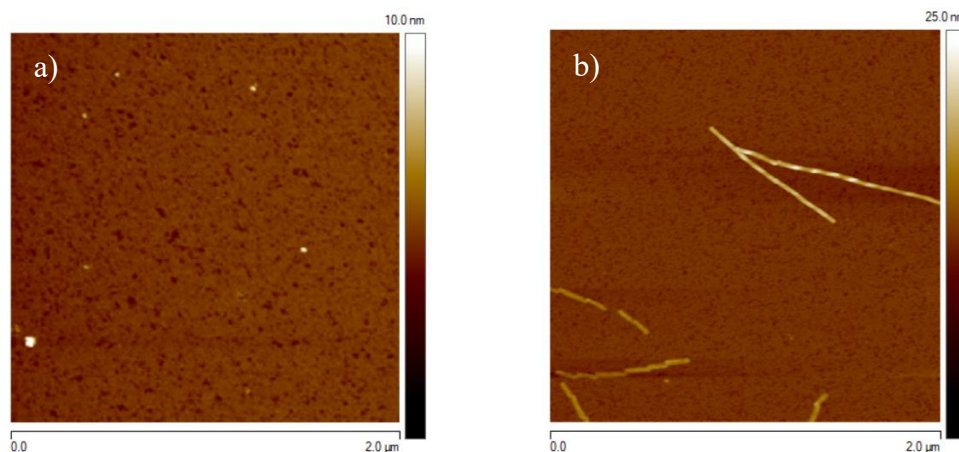

**Figure S1.** AFM images of *D*-TTR sample investigated prior (a) and after the incubation (b). For the images recorded before and after incubation, scale is set to 10 and 25 nm, respectively.

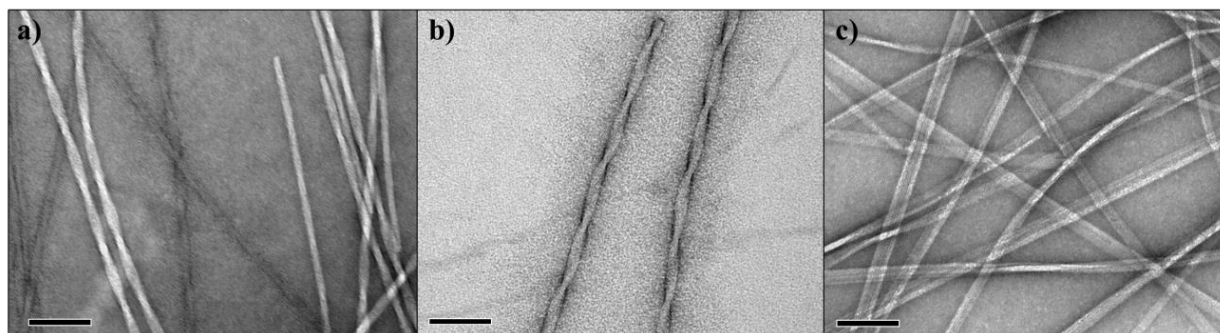

**Figure S2.** TEM micrographs of *L*-TTR (a), *D*-TTR (b) and *L/D*-TTR (c) incubated for 14 days in MeCN/H<sub>2</sub>O (1:9) at pH 2. Scale bars = 200 nm.

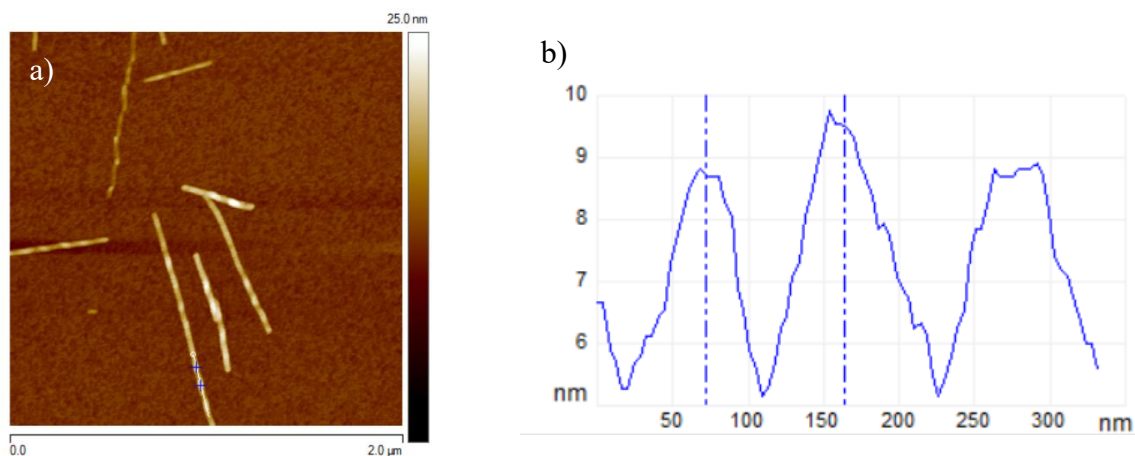

**Figure S3.** AFM image of fibrils formed from *L*-TTR (a) and the corresponding height profile (b) revealing regular cross-over distance among the fibrils' length (cross-over distance equal 93 nm, as denoted with vertical lines).

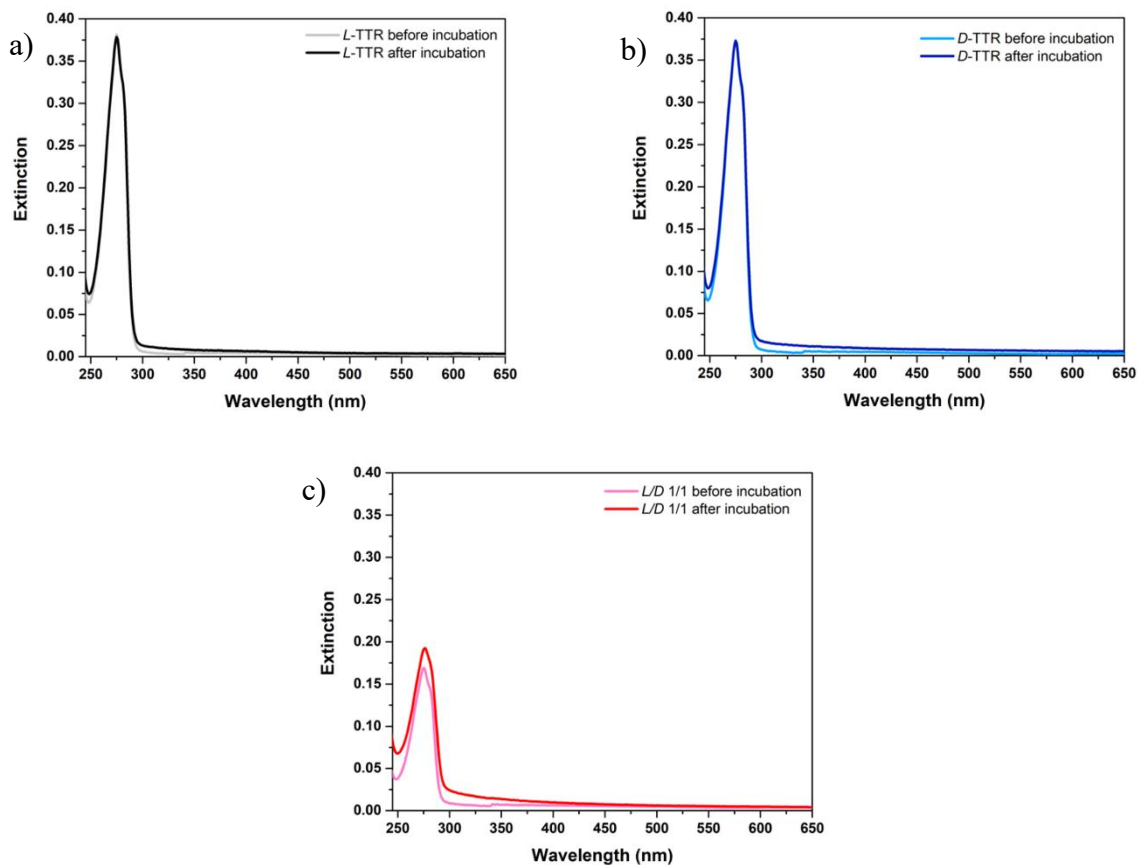

**Figure S4.** Extinction spectra of samples recorded before and after incubation: *L*-TTR (grey and black) (a), *D*-TTR (light blue and blue) (b), racemic mixture *L/D* 1/1 (rose and red) (c), respectively.

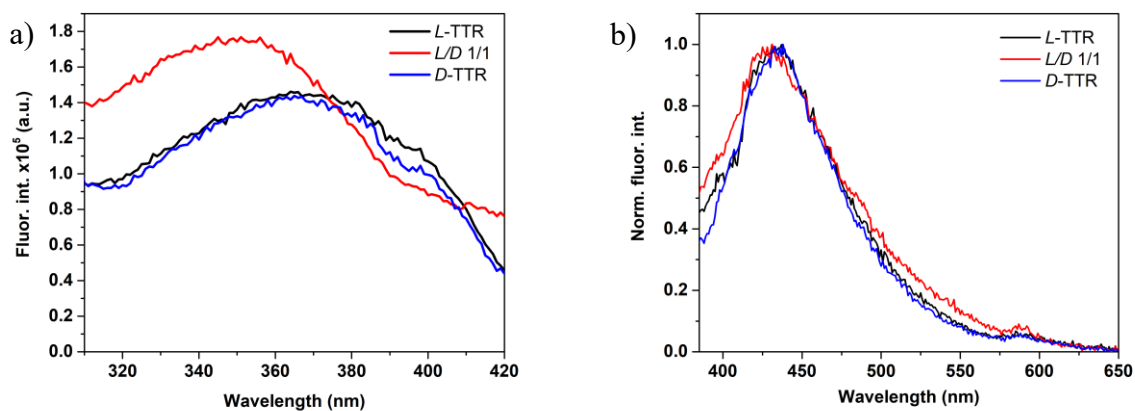

**Figure S5.** Fluorescence excitation ( $\lambda_{em} = 450$  nm) (a) and emission ( $\lambda_{exc} = 360$  nm) (b) spectra recorded for *L*-TTR (black), the racemate (red) and *D*-TTR (blue) after incubation.

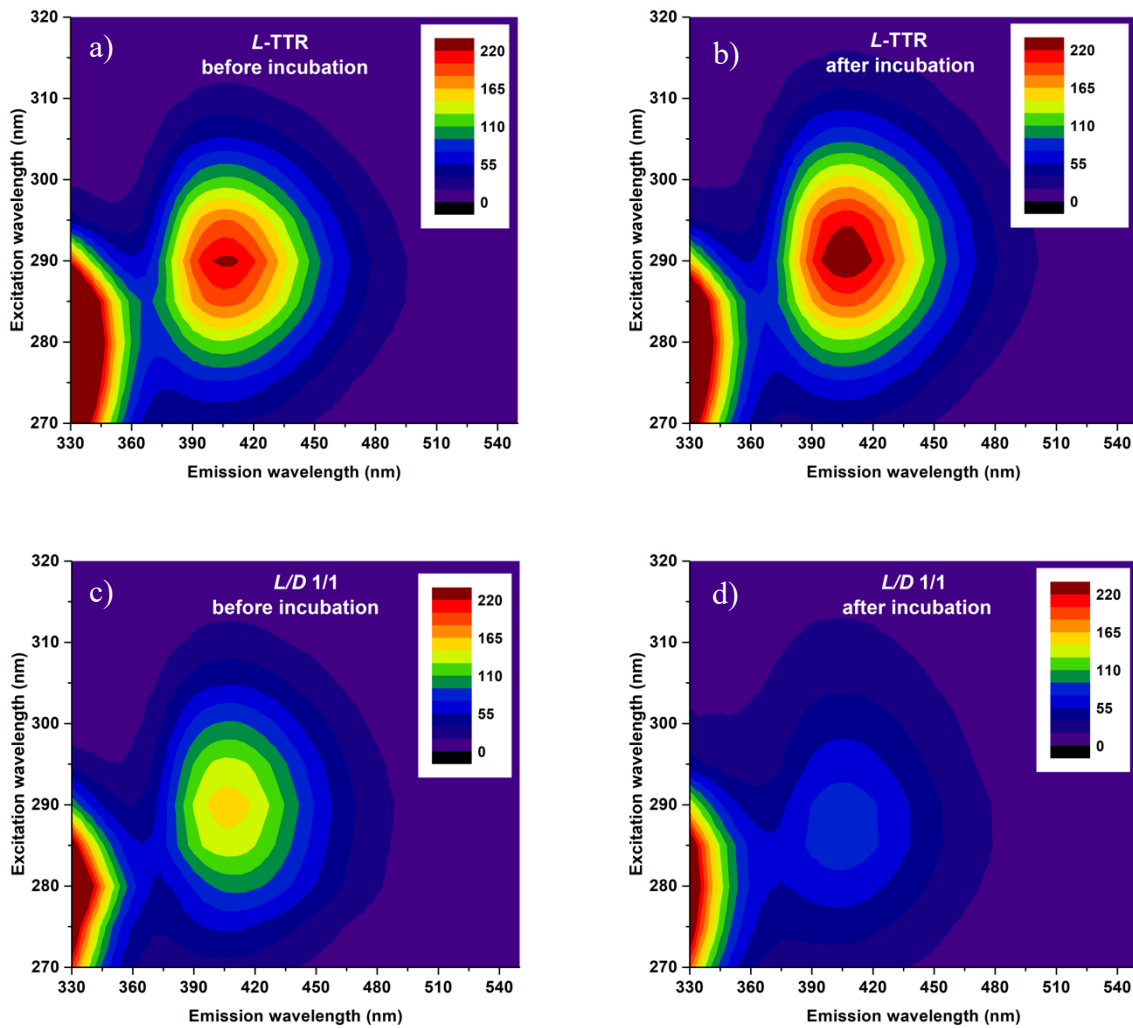

**Figure S6.** Fluorescence excitation-emission maps in the excitation range 270-320 nm recorded for *L*-TTR and the racemate (*L/D* 1/1) before (a, c) and after incubation (b, d), respectively.

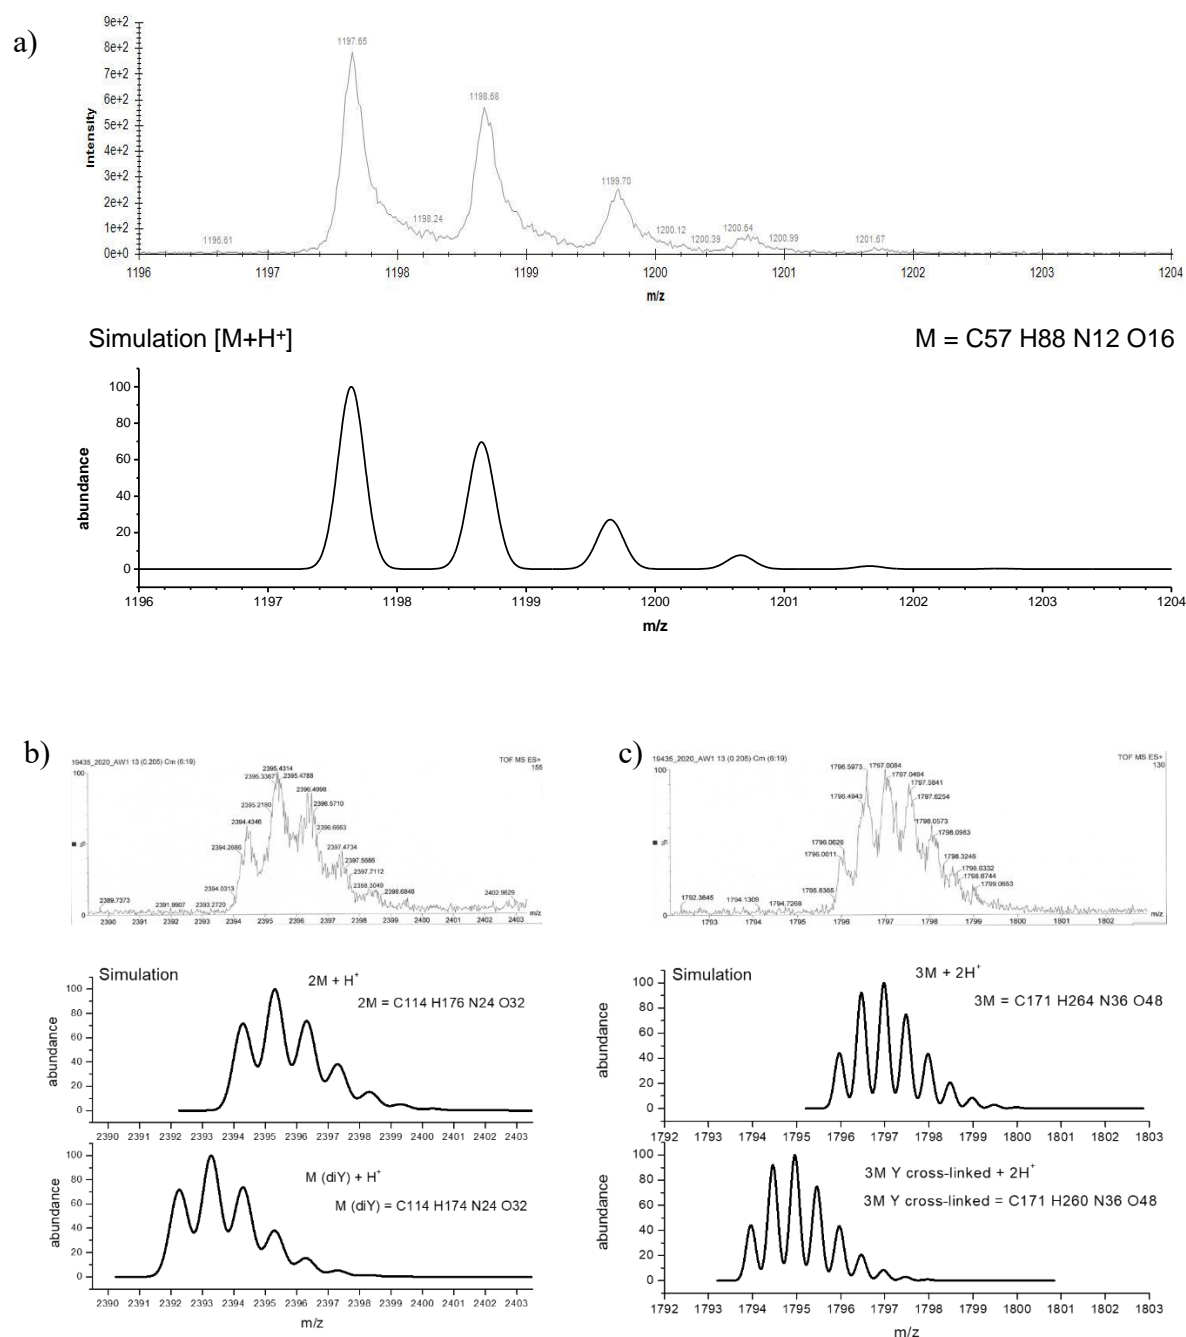

**Figure S7.** ESI-MS spectra confirming the absence of covalent Tyr cross-links in *L*-TTR(105-115). Experimental spectrum with isotopic resolution for 1H<sup>+</sup> charge state (top panel) and its theoretical simulation using IsoPro (v.3) software (lower panel) (a). Experimental spectra for ion clusters 2M+H<sup>+</sup> and 3M+2H<sup>+</sup> (top panels) and the corresponding theoretical simulations (middle panels) (b, c). In addition, theoretical simulations were performed for putative Tyr cross-linked species (lower panels) showing that their masses are lower than the observed values. The spectra were acquired and analyzed for *D*-TTR(105-115) and the racemic mixture as well, where the results were similar to shown in this Figure.

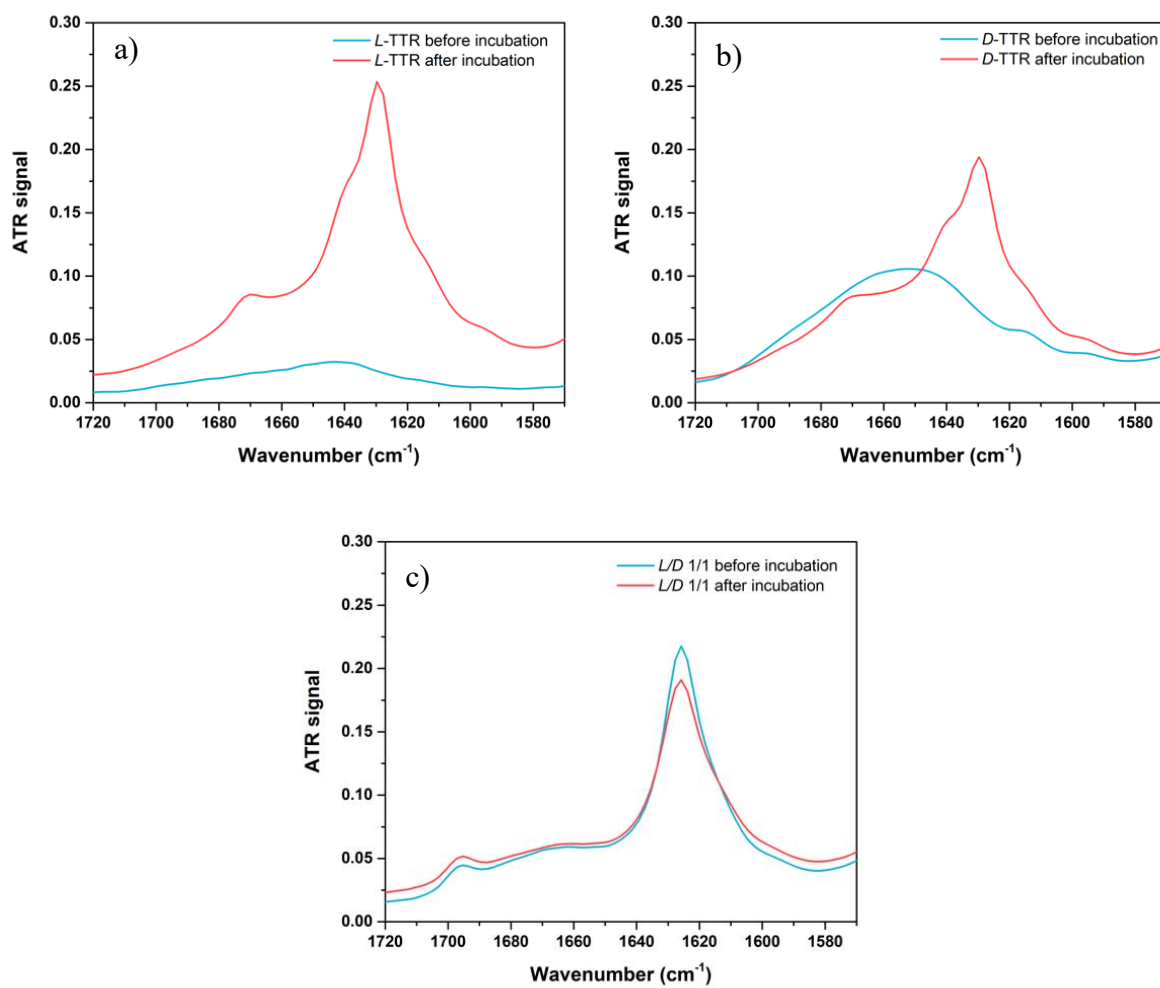

**Figure S8.** ATR-FTIR spectra of *L*-TTR (a), *D*-TTR (b) and racemic mixture *L/D*-TTR (c) before (blue) and after incubation (red).

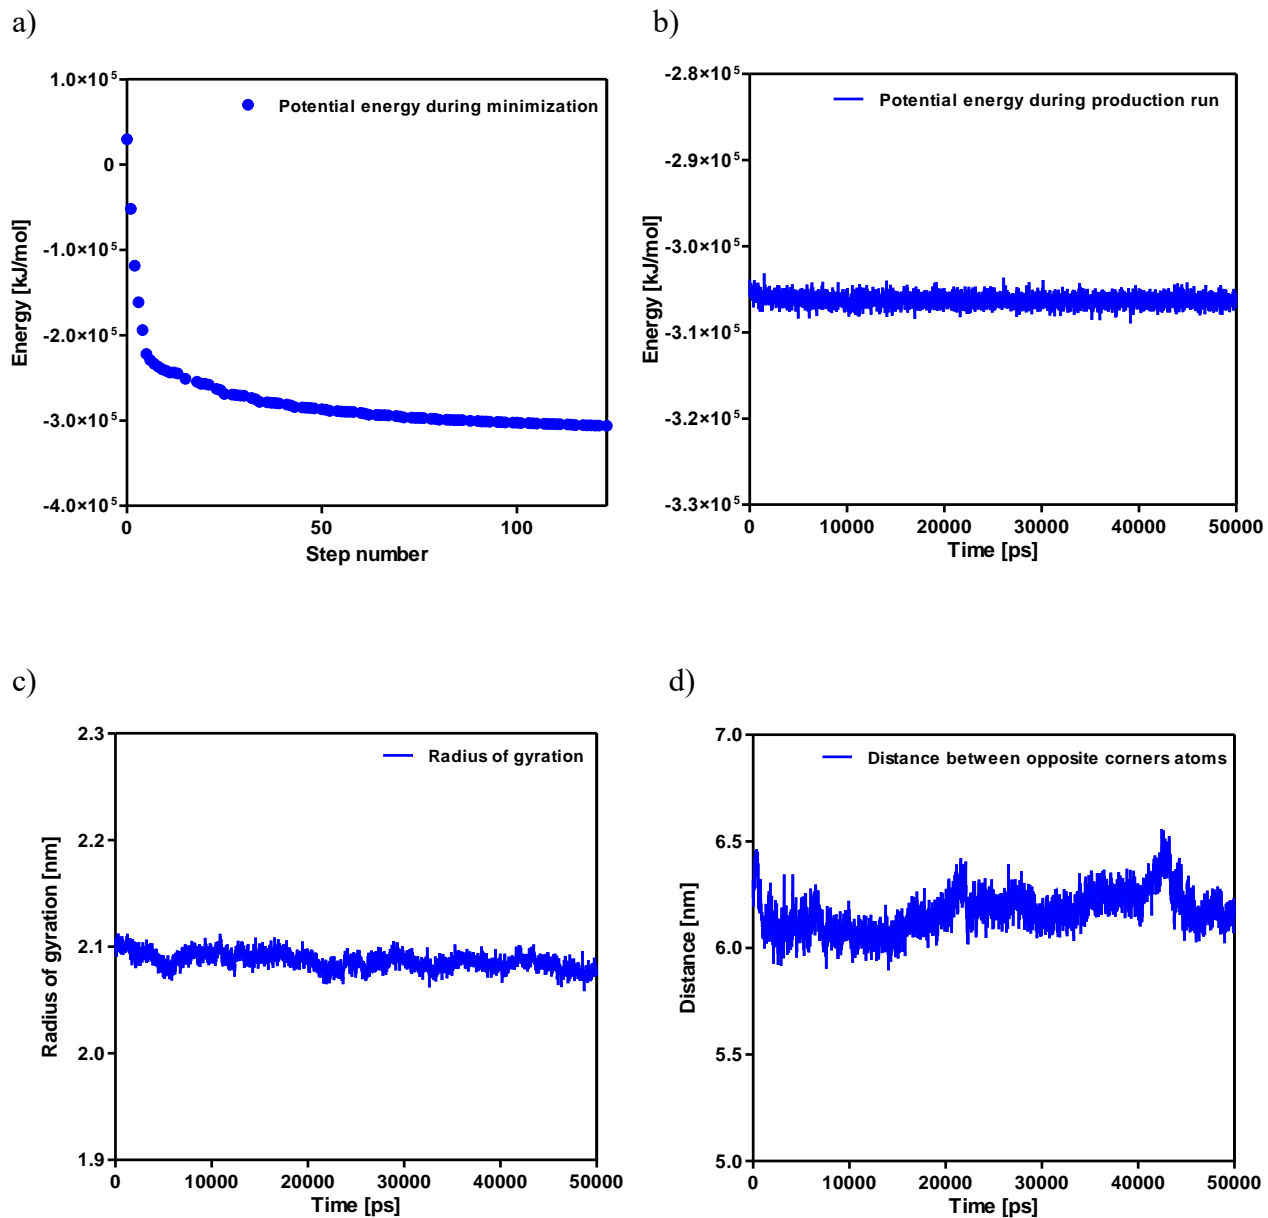

**Figure S9.** Potential energy during minimization of MD simulation of antiparallel *L/D*-TTR fibrils (a), potential energy during production run (b), radius of gyration (c), the distance between the opposite corners atoms (d).

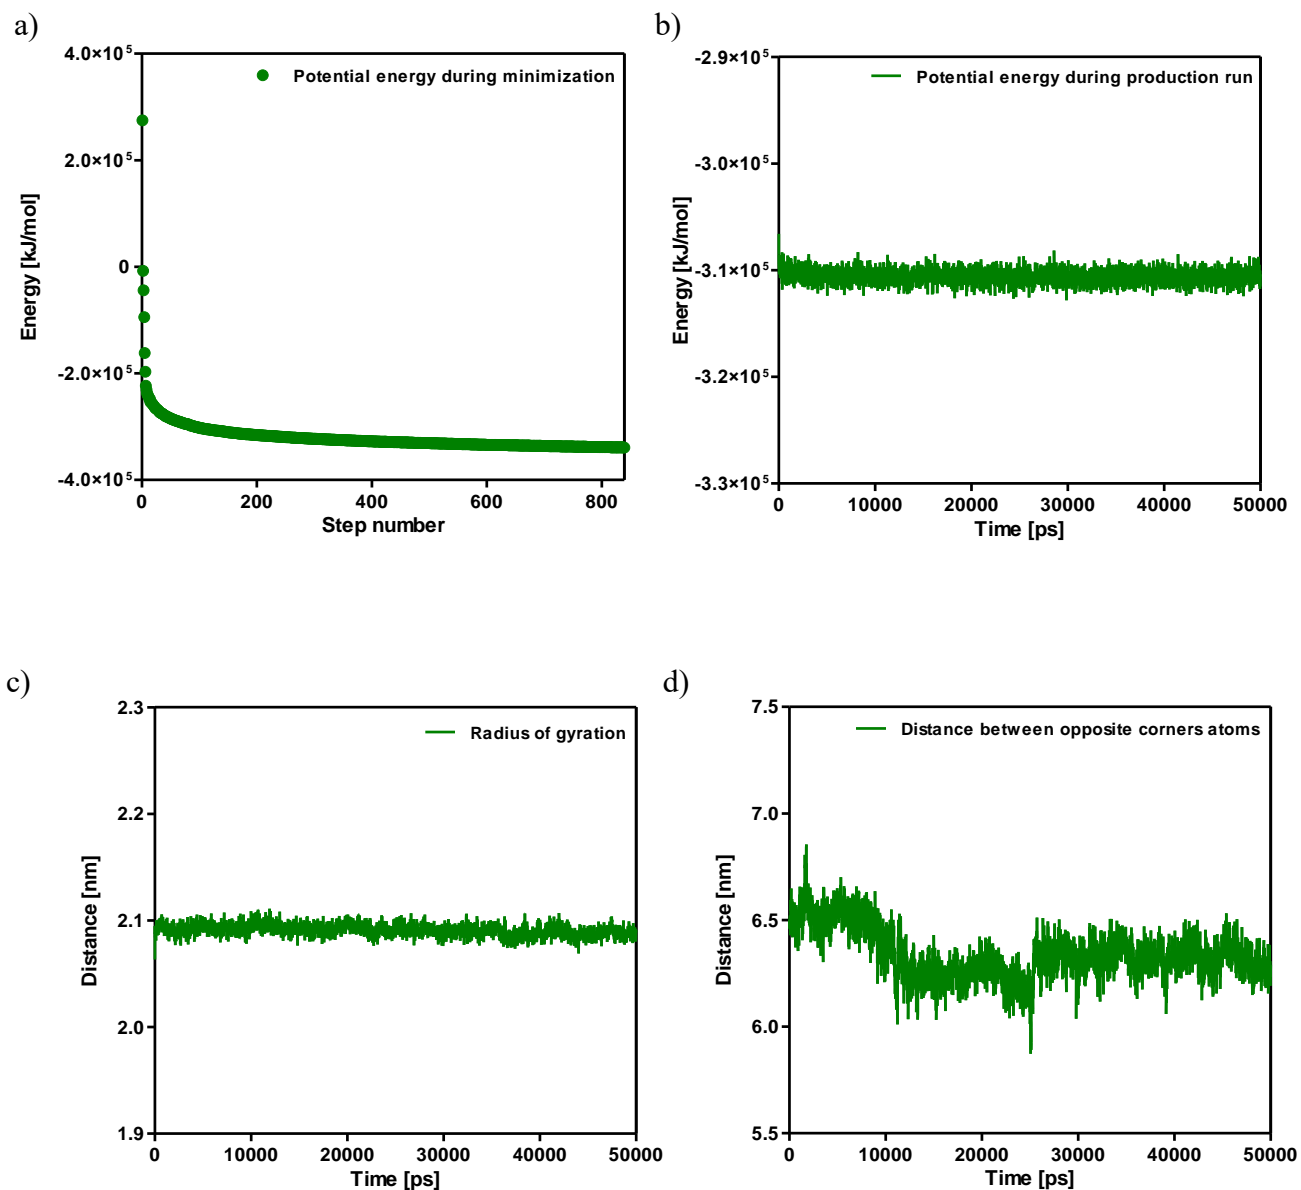

**Figure S10.** Potential energy during minimization of MD simulation of parallel *L*-TTR fibrils (a), potential energy during production run (b), radius of gyration (c), the distance between the opposite corners atoms (d).



a)

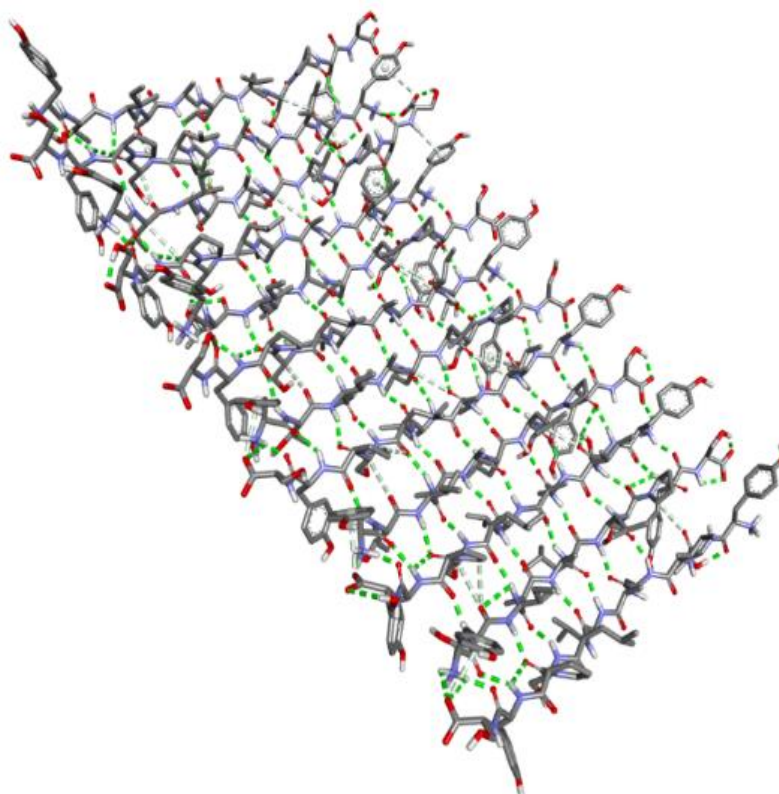

b)

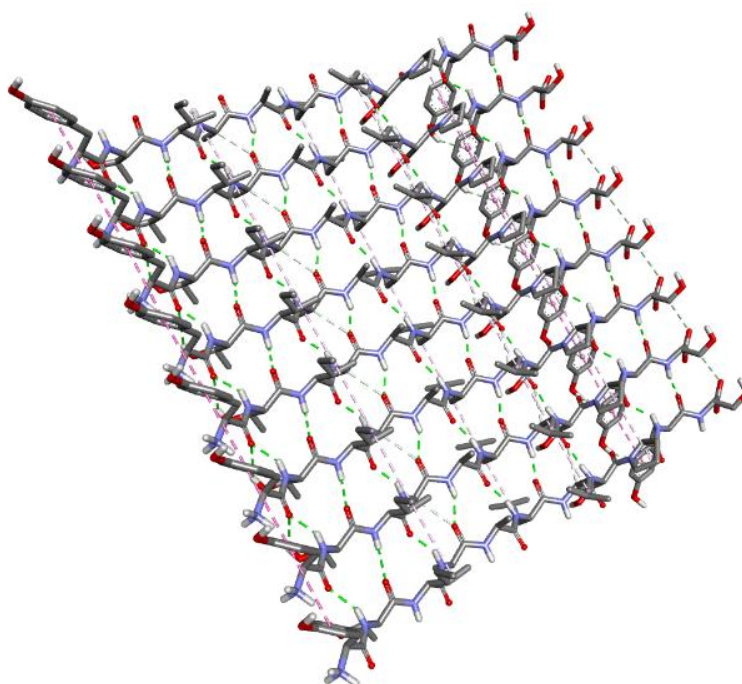

**Figure S11.** The model structure representing one layer composed of alternating *L*- and *D*-strands in racemic mixture (a) and of adjacent *L*-strands in *L*-TTR(105-115) enantiomer (b).
